# Supplementary material
Source: Springer Nature journal article supplement (https://www.springermedizin.de/resource/supplementary/12874_2010_544_MOESM1_ESM.pdf/9432450)
Supplement: MOESM1 [file 9432450]

**IMPLEMENT intervention and control delivered**

6 weeks

**Patient recruitment strategy #1**

Posters and postcards in waiting room of participating practices, inviting acute low back pain patients to opt in to study

16 weeks

13 eligible patients recruited

**Patient recruitment strategy #2\***

- GP invites acute LBP patient to participate in study at time of consultation
- Patient accepts invitation to participate, completes consent form and research team contacts patient

**Patient recruitment strategy #3\***

- GP identifies eligible patients from practice list at end of day
- Patient sent recruitment material via mail and then if agrees to participate contacts research team

12 weeks

16 eligible patients recruited

**Patient recruitment abandoned**

\* GPs were able to choose to undertake recruitment strategy #2 and/or #3
